# Supplementary material for: β-Hydroxy-β-methylbutyrate (HMB) leads to phospholipase D2 (PLD2) activation and alters circadian rhythms in myotubes
Source: Royal Society of Chemistry journal article supplement (doi:10.1039/d3fo04174c), 2024-01-01
Supplement: d3fo04174c2.pdf [file d3fo04174c2.pdf]

**Supplementary Table S1: Quantitative real-time PCR primer sequences**

| Gene            | Forward primer                 | Reverse primer                  |
|-----------------|--------------------------------|---------------------------------|
| <i>Actin</i>    | 5'-CTAAGGCCAACCGTGAAAAG-3'     | 5'-GGGGTGTGAAGGTCTCAAA-3'       |
| <i>Bmal1</i>    | 5'-CAAGAATGCAAGGGAGGCC-3'      | 5'-TTGTCCCGACGCCTCTTTT-3'       |
| <i>Clock</i>    | 5'-CCTAGAAAATCTGGCAAAATGTCA-3' | 5'-CCTTTCCATATTGCATTAAGTGCT-3'  |
| <i>Cry1</i>     | 5'-AGGCAGCTGATGTATTCCCA-3'     | 5'-AGTTTAGTGATGTTCCATTCTTGAA-3' |
| <i>Rora</i>     | 5'-CAGAAATGCCTGGCCGTG-3'       | 5'-CCGACCAAACCTTGACAGCATC-3'    |
| <i>Reverba</i>  | 5'-GGGCACAAGCAACATTACCAA-3'    | 5'-CACCTTACACAGTAGCACCATGC-3'   |
| <i>Myogenin</i> | 5'-GGCAATGCACTGGAGTTCG-3'      | 5'-AGCCGCGAGCAAATGATC-3'        |
| <i>Pld2</i>     | 5'-TTGCGGAAGCACTGTTTCAGTGTC-3' | 5'-TTGTTCTCCGCTGTTTCTTGCCAC-3'  |

**Supplementary Table S2: Phase and amplitude of clock genes in HMB-treated C2C12 cells**

| Gene            | Phase (h)   |         |           | Amplitude |      |             |
|-----------------|-------------|---------|-----------|-----------|------|-------------|
|                 | Control (h) | HMB (h) | Shift (h) | Control   | HMB  | Fold change |
| <i>Bmal1</i>    | 24          | 18      | -6        | 0.36      | 0.55 | 1.52        |
| <i>Clock</i>    | 12          | 24      | +12       | 0.29      | 0.61 | 2.1         |
| <i>Cry1</i>     | 6           | 24      | -6        | 0.28      | 0.39 | 1.39        |
| <i>Rora</i>     | 24          | 18      | -6        | 0.47      | 0.63 | 1.34        |
| <i>Rev-erba</i> | 18          | 18      | 0         | 1.06      | 1.67 | 1.57        |
